# Supplementary material for: MEN1309/OBT076, a First-In-Class Antibody–Drug Conjugate Targeting CD205 in Solid Tumors
Source: Oxford University Press journal article supplement (doi:10.1158/1535-7163.mct-18-0624), 2019-06-21
Supplement: 15357163mct180624-sup-203360_3_supp_5580040_psxv2x.docx [file 15357163mct180624-sup-203360_3_supp_5580040_psxv2x.docx]

Supplementary Figure S1

**Supplementary Figure S1.** Representative images of IHC staining for CD205 in different human and cynomolgus tissues, obtained with 2 μg/ml of MEN1309/OBT076 at 20X and 10X magnification. 1) Human donor spleen; moderate to strong membranous/granular cytoplasmic staining of several mononuclear cells present in the white pulp of the spleen (circle); 2) Cynomolgus donor spleen; the staining intensity and distribution pattern was very similar to that described in human samples; 3) Human donor lymph node; a moderate to marked membranous/cytoplasmic staining of mononuclear cells in the cortex, para-cortex and germinal centers of lymphoid follicles was observed; 4) Cynomolgus donor lymph node; positive mononuclear cells presented a moderate to strong membranous/granular cytoplasmic staining; 5) Human donor breast; a concentration-dependent cytoplasmic staining of epithelial cells in glandular alveoli (rectangle) and ducts (circle); 6) Cynomolgus donor breast; the staining was weaker in intensity when compared to human donors, but the pattern was comparable; 7) Human donor colon; membranous/cytoplasmic signal of a variable number of mononuclear cells was observed in the lamina propria and GALT (circle). Minimal to slight cytoplasmic staining of the superficial mucosal epithelium (rectangle); 8) Cynomolgus donor colon; a variable number of mononuclear cells located in lamina propria and GALT (circle) are positive with membranous/cytoplasmic signal; 9) Human donor ureter; a minimal but concentration-dependent staining was observed in mucosal epithelium (rectangle). Rare mononuclear cells with positive signal in lamina propria (circles); 10) Cynomolgus donor ureter; occasional mononuclear cells with membranous/granular cytoplasmic staining was observed in the lamina propria; 11) Human donor cervix; a concentration-dependent cytoplasmic staining of cervical gland epithelium was observed (circle). Cytoplasmic staining of the basal cell layer of mucosal epithelium was also observed (rectangle); 12) Cynomolgus donor cervix; positive mononuclear cells with a membranous/granular cytoplasmic staining were present in the mucosa-associated lymphoid nodules (circle).
