# Supplementary material for: MEN1309/OBT076, a First-In-Class Antibody–Drug Conjugate Targeting CD205 in Solid Tumors
Source: Oxford University Press journal article supplement (doi:10.1158/1535-7163.mct-18-0624), 2019-06-21
Supplement: 15357163mct180624-sup-203360_3_supp_5580042_psxv2y.docx [file 15357163mct180624-sup-203360_3_supp_5580042_psxv2y.docx]

Supplementary Figure S3-A

Supplementary Figure S3-B

**Supplementary Figure S3-A.** Representative image of IHC staining for CD205 in a tumor mass from HCC-70 xenograft model, 16 days far from the initial treatment with 5 mg/kg of MEN1309/OBT076. The semiquantitative IHC analysis showed a score of 1+ in 30% of cells while the remaining were scored negative (0).

**Supplementary Figure S3-B.** Representative image of IHC staining for CD205 in a tumor mass from PDX-347 model, 16 days far from the initial treatment with 5 mg/kg of MEN1309/OBT076. The semiquantitative IHC analysis showed a score of 2+ in 100% of cells. Red and green lines represent tumor and fibrotic areas.
