# Supplementary material for: MEN1309/OBT076, a First-In-Class Antibody–Drug Conjugate Targeting CD205 in Solid Tumors
Source: Oxford University Press journal article supplement (doi:10.1158/1535-7163.mct-18-0624), 2019-06-21
Supplement: 15357163mct180624-sup-203360_3_supp_5580043_psxv2y.docx [file 15357163mct180624-sup-203360_3_supp_5580043_psxv2y.docx]

| **Tissue Microarray Supplier** | **Description** |
| --- | --- |
| Tristar 69571062 | Bladder |
| US Biomax BR1008 | Breast |
| US Biomax BR483 | Breast |
| Tristar 69573112 | Breast (TNBC) |
| US Biomax CO483 | Colon |
| US Biomax CO1004 | Colon |
| Tristar 79562478 | Colorectal (metastasis) |
| Tristar 69572153 | Gastric |
| US Biomax LUC961 | Lung |
| US Biomax OV483 | Ovarian |
| US Biomax BC11115 | Ovarian |
| US Biomax PA483b | Pancreatic |
| US Biomax PA961 | Pancreatic |

Supplementary Table S1

**Supplementary Table S1.** Commercial tumor TMAs representing different solid tumor types.

Supplementary Table S2

| **Cancer Type** | **Number of Patient Biopsy** | **Incidence of CD205 expression ≥ 1+ (%)** | **Incidence of CD205 expression 2+ 3+ (%)** |
| --- | --- | --- | --- |
|  |  |  |  |
| **Bladder** | 80 | 70 | 63 |
| **primary** | 70 | 67 | 60 |
| **metastases** | 10 | 90 | 80 |
| **Breast** | 121 | 17 | 6 |
| **primary** | 84 | 23 | 7 |
| **metastases** | 37 | 5 | 3 |
| **TNBC** | 36 | 75 | 56 |
| **Colon** | 112 | 71 | 38 |
| **Colorectal (metastatic)** | 108 | 91 | 85 |
| **primary** | 49 | 94 | 94 |
| **metastases** | 59 | 88 | 78 |
| **Gastric** | 87 | 78 | 72 |
| **Lung** | 72 | 50 | 21 |
| **Ovarian** | 125 | 34 | 5 |
| **primary** | 114 | 35 | 5 |
| **metastases** | 11 | 18 | 0 |
| **Pancreatic** | 120 | 68 | 25 |

**Supplementary Table S2.** Summary of CD205 expression in human solid tumor types.
