# Supplementary material for: MEN1309/OBT076, a First-In-Class Antibody–Drug Conjugate Targeting CD205 in Solid Tumors
Source: Oxford University Press journal article supplement (doi:10.1158/1535-7163.mct-18-0624), 2019-06-21
Supplement: 15357163mct180624-sup-203360_3_supp_5580044_psxv2y.docx [file 15357163mct180624-sup-203360_3_supp_5580044_psxv2y.docx]

Supplementary Table S3

| **MBH1309/OBT076 EC50 (µg/ml)** | | | | |
| --- | --- | --- | --- | --- |
|  | **Rat** | **Mouse** | **Cynomolgus** | **Human** |
| **Granulocytes** | >20 | >4 | 0.47 | 0.90 |
| **Monocytes** | >20 | >1 | 1.31 | 0.45 |
| **Dentritic cells** | >20 | >1 | 0.64 | 2.5 |
| **Lymphocytes** | >20 | 22 | 0.36 | 0.65 |

**Supplementary Table S3:** Cross reactivity data obtained from whole blood of different species. Values are expressed as the concentration at which MBH1309/OBT076 has half-maximum binding [EC50].
