# Supplementary material for: MEN1309/OBT076, a First-In-Class Antibody–Drug Conjugate Targeting CD205 in Solid Tumors
Source: Oxford University Press journal article supplement (doi:10.1158/1535-7163.mct-18-0624), 2019-06-21
Supplement: 15357163mct180624-sup-203360_3_supp_5580046_psxv2y.docx [file 15357163mct180624-sup-203360_3_supp_5580046_psxv2y.docx]

Supplementary Table S5

| **Cynomolgus Tissue/location/staining pattern** | **MEN1309/OBT076 2 µg/ml** | | | **MEN1309/OBT076 0,5 µg/ml** | | | **MEN1309/OBT076 0,125 µg/ml** | | | **Isotype Control 2 µg/ml** | | | **Buffer Control** | | |
| --- | --- | --- | --- | --- | --- | --- | --- | --- | --- | --- | --- | --- | --- | --- | --- |
| D1 | D2 | D3 | D1 | D2 | D3 | D1 | D2 | D3 | D1 | D2 | D3 | D1 | D2 | D3 |
| *Blood* |  |  |  |  |  |  |  |  |  |  |  |  |  |  |  |
| mononuclear cells, membranous/granular cytoplasmic | 2 | 2 | 2 | 2 | 2 | 2 | 1 | 1 | 1 | 0 | 0 | 0 | 0 | 0 | 0 |
| *Bone Marrow* |  |  |  |  |  |  |  |  |  |  |  |  |  |  |  |
| mononuclear cells, granular cytoplasmic | p | p | p | p | p | p | p | p | p | p | p | p | p | p | p |
| *Lung* |  |  |  |  |  |  |  |  |  |  |  |  |  |  |  |
| mononuclear cells, BALT/alveolar wall, membranous/granular cytoplasmic | 1 | 0 | 1 | 1 | 0 | 1 | 0 | 0 | 0 | 0 | 0 | 0 | 0 | 0 | 0 |
| *Skin* |  |  |  |  |  |  |  |  |  |  |  |  |  |  |  |
| mononuclear cells, dermal lymphoid nodule, membranous/granular cytoplasmic | 0 | 1 | 0 | 0 | 1 | 0 | 0 | 1 | 0 | 0 | 0 | 0 | 0 | 0 | 0 |

**Supplementary Table S5:** Microscopic IHC staining for CD205 in different cynomolgus tissues after treatment with MEN1309/OBT076. Staining: 1, minimal (+, rare cells with low staining intensity); 2, slight/moderate (++, many cells with medium/high staining intensity); 3, marked (+++, significant numbers of cells with high staining intensity); 0, negative (no stained cells); -, no background present; tm, tissue missing; lp, lesion present; p, background staining present; N/A, not applicable.
